# Supplementary material for: Covalent organic frameworks with high quantum efficiency in sacrificial photocatalytic hydrogen evolution
Source: PubMed Central journal article supplement (PMC9054748; doi:10.1038/s41467-022-30035-x), 2022-04-29
Supplement: 41467_2022_30035_MOESM3_ESM.pdf [file 41467_2022_30035_MOESM3_ESM.pdf]

### **Description of Additional Supplementary Files**

File Name: Supplementary Movie 1

Description: CYANO-CON film irradiated under visible light ( $\lambda > 420$  nm).
